# Supplementary material for: In situ fabrication of a robust P–N heterojunction based on Mn–Zn–S–ethylenediamine hybrid nanorods for boosting photocatalytic performance
Source: Royal Society of Chemistry journal article supplement (doi:10.1039/d3nj05879d), 2024-01-01
Supplement: d3nj05879d1.pdf [file d3nj05879d1.pdf]

# ***In-situ* fabricating a robust P-N heterojunction based on Mn-Zn-S-ethylenediamine hybrid nanorods for boosting photocatalytic performance**

Zhi-Yu Liang<sup>a, b</sup>, Wang-Jun Huang<sup>c</sup>, Er-Da Zhan<sup>d</sup>, Peng Yang<sup>a, b</sup>, Ren-Kun Huang<sup>a, b</sup>, Ying Wang

<sup>a, b</sup>, Gui-Yang Yan<sup>a, b</sup>

<sup>a</sup>Fujian Provincial Key Laboratory of Featured Materials in Biochemical Industry, College of New Energy and Materials, Ningde Normal University, Fujian 352100, China

<sup>b</sup>Province University Key Laboratory of Green Energy and Environment Catalysis, Ningde Normal University, Ningde 352100, P. R. China

<sup>c</sup>College of Environmental and Resources Sciences, Fujian Normal University, Fujian 350117, China

<sup>d</sup>College of Chemistry, Fuzhou University, Fujian 350117, China

E-mail: ygyfjnu@163.com

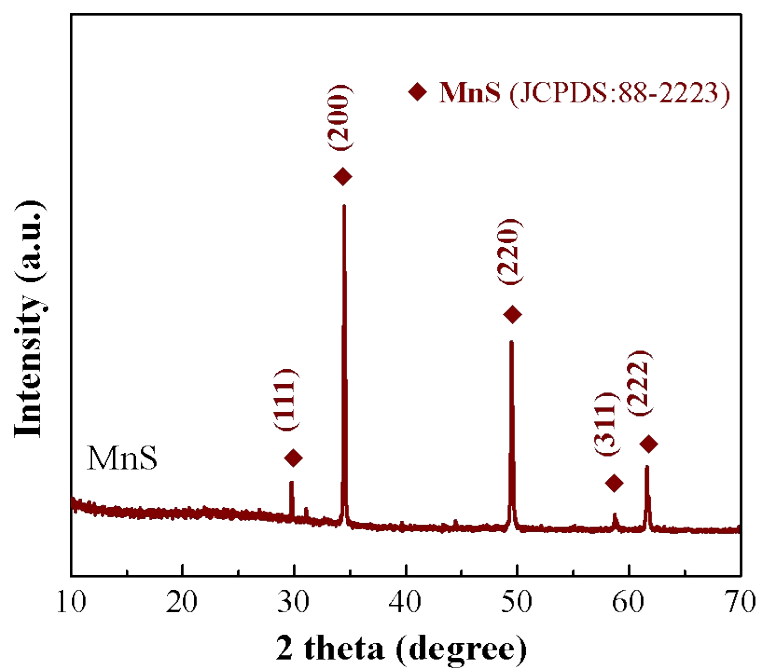

Figure S1. XRD patterns of pristine MnS.

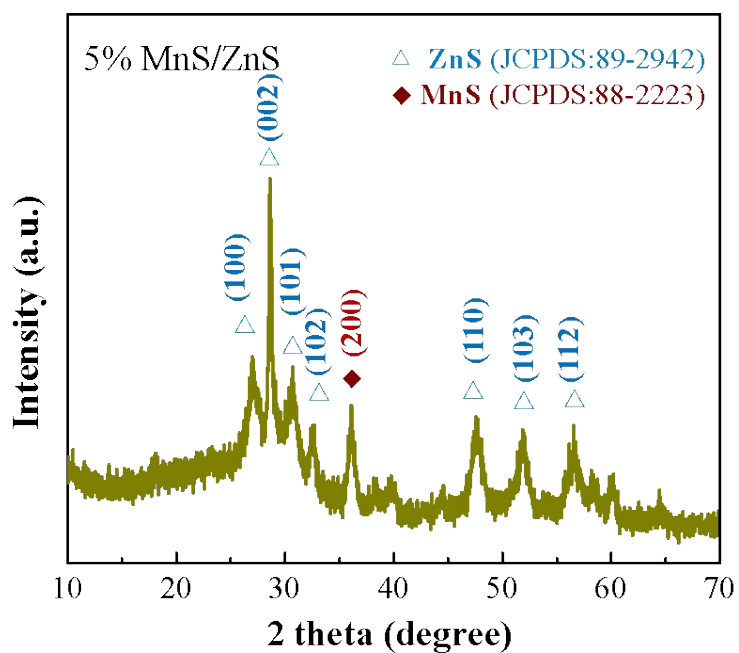

Figure S2. XRD patterns of 5% MnS/ZnS counterpart prepared by the chemical deposition method.

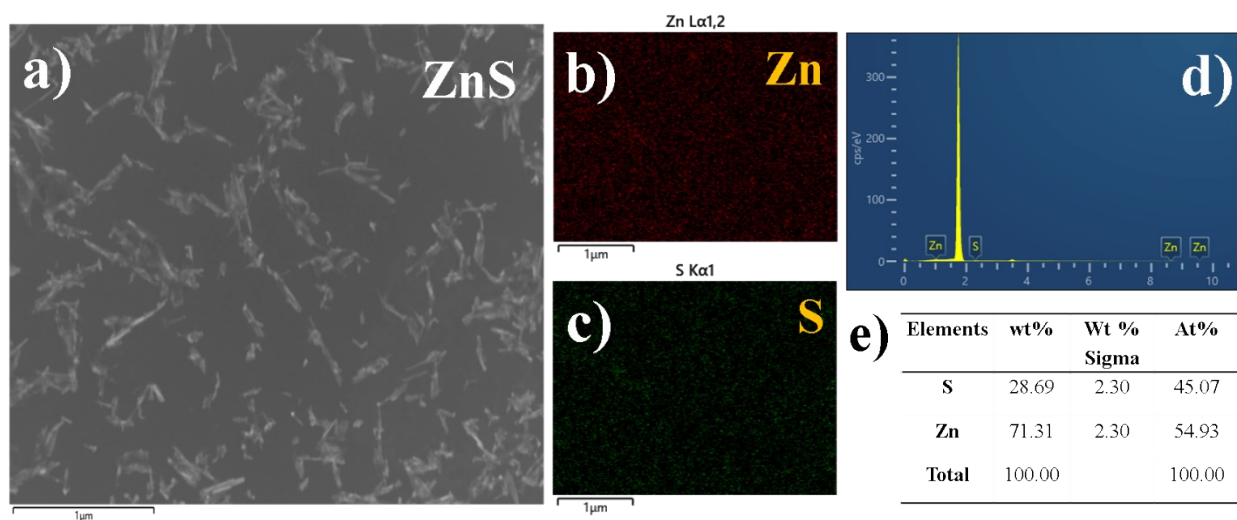

**Figure S3.** (a)FESEM image of pristine ZnS-DEA with (b-c) corresponding elements mapping results. (d-e)The EDX result of pristine ZnS-DEA.

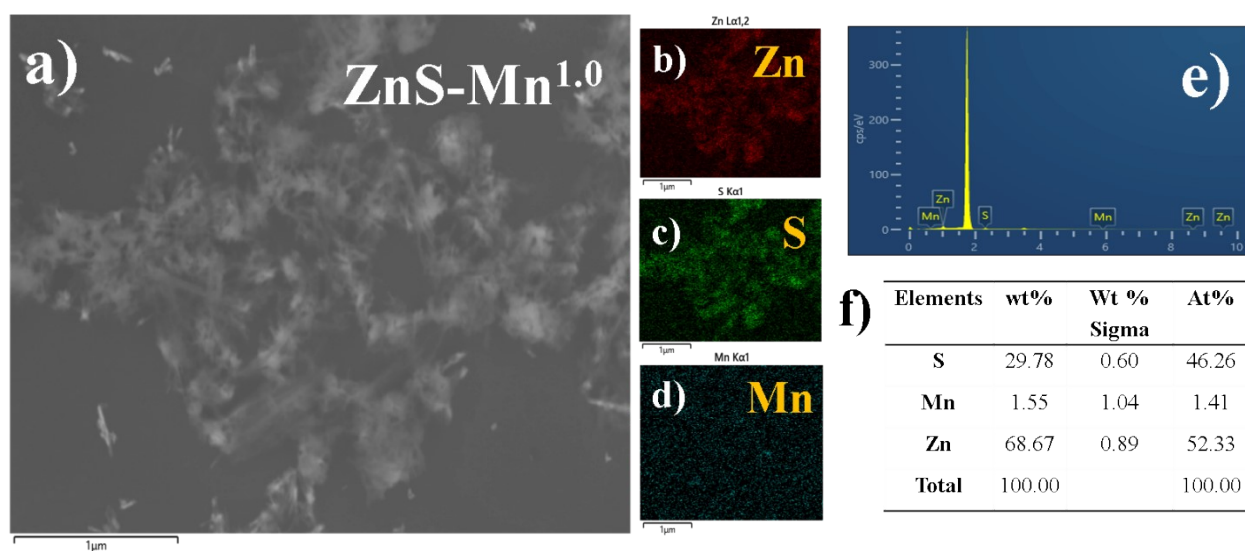

**Figure S4.** (a)FESEM image of ZnS-Mn<sup>1.0</sup> NRs with (b-c) corresponding elements mapping results. (d-e)The EDX result of ZnS-Mn<sup>1.0</sup> NRs.

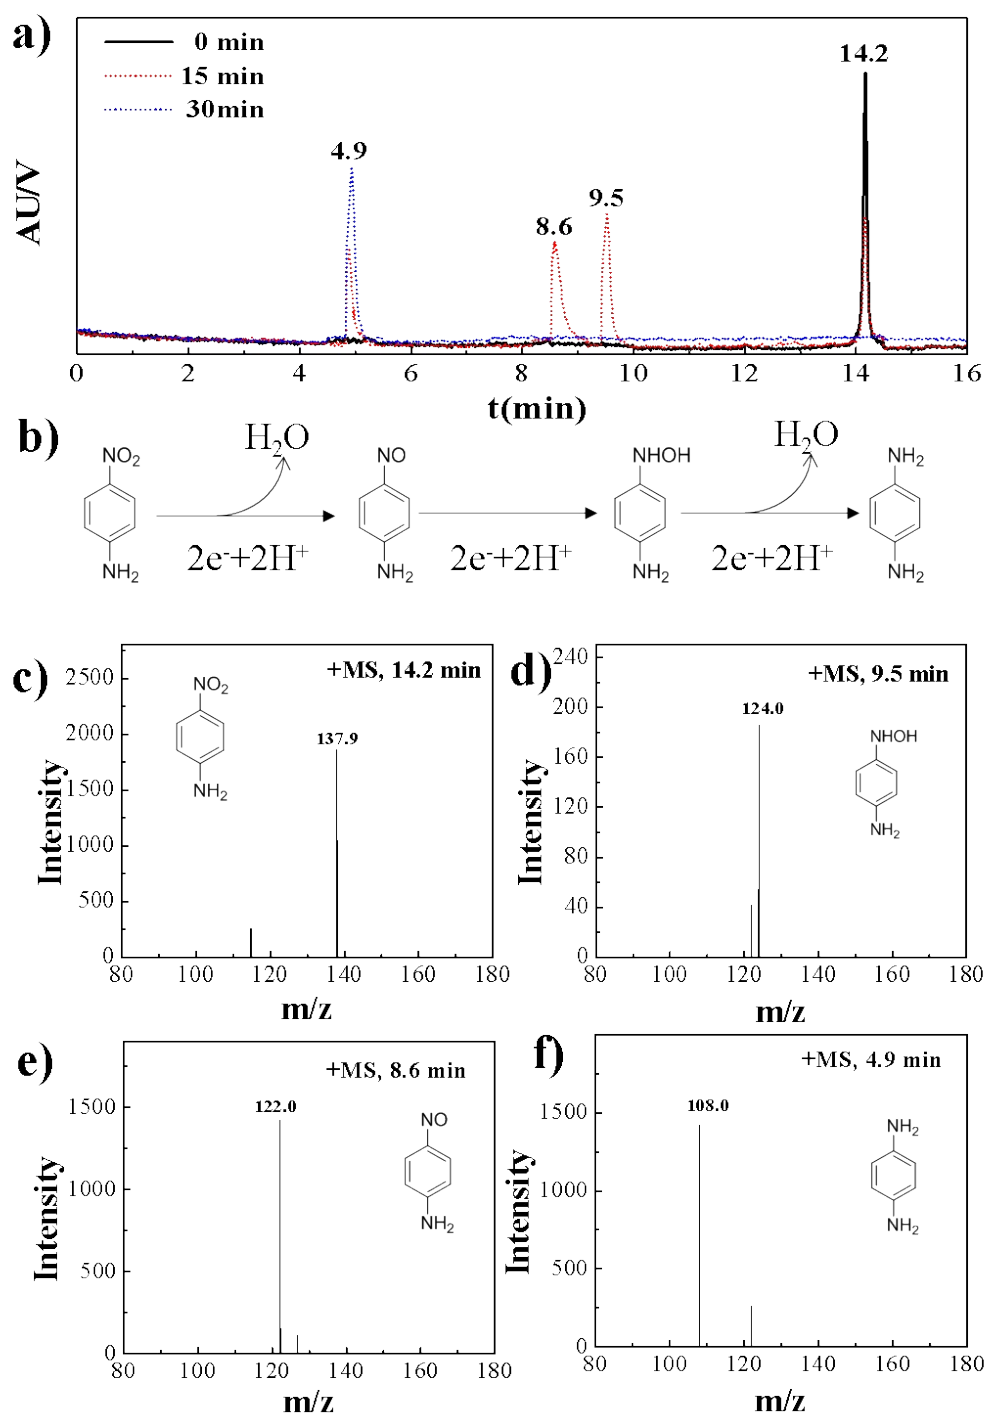

**Figure S5.** (a, c-f) LC-MS spectrum of the intermediates of phenol oxidized by ZnS-Mn<sup>1.0</sup> NRs; (g) the possible process of oxidation reaction of phenol.

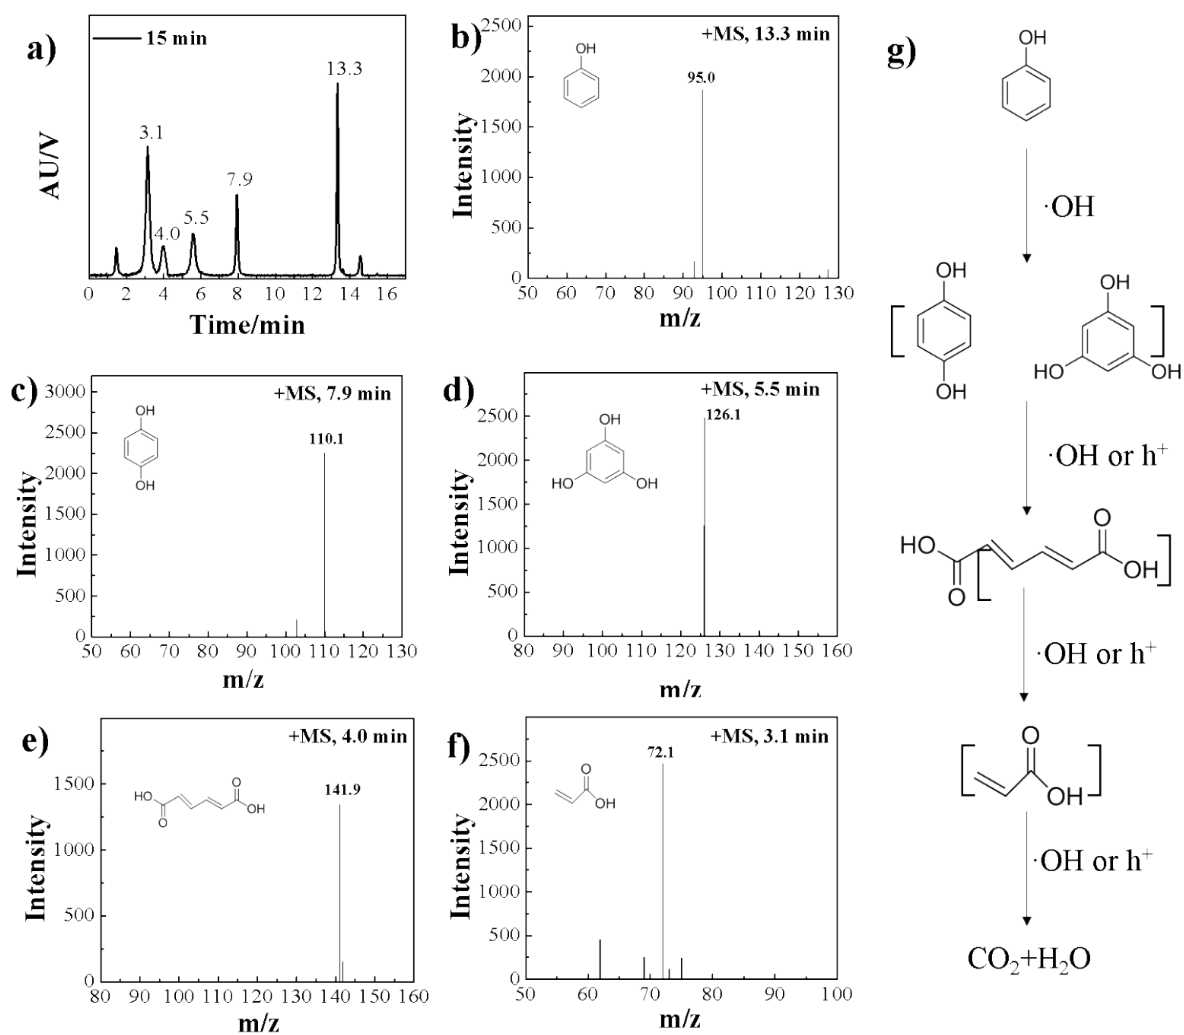

**Figure S6.** (a-f) LC-MS spectrum of the intermediates of *p*-nitrophenol reduced by ZnS-Mn<sup>1.0</sup> NRs; (g) the possible process of reduction reaction of *p*-nitrophenol.

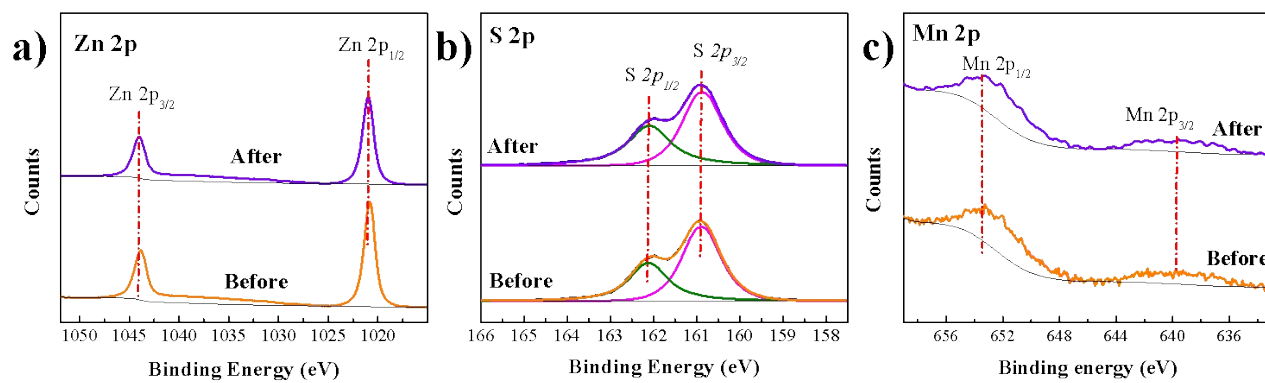

**Figure S7.** High-resolution (a) Zn 2p, (b) S 2p and (c) Mn 2p spectra of the ZnS-Mn<sup>1.0</sup> NRs before and after five cyclic experiments.

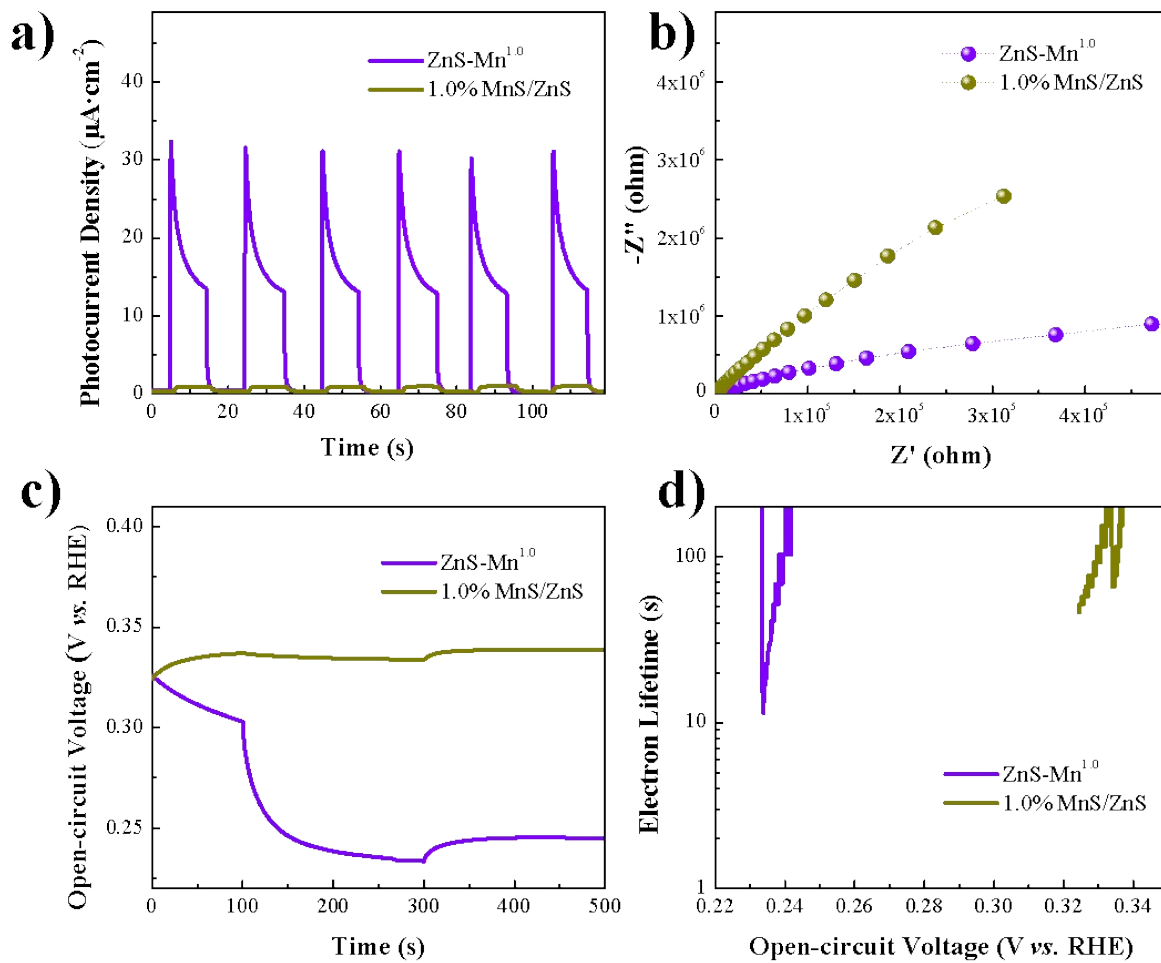

**Figure S8.** (a) Transient photocurrent responses (i-t), EIS Nyquist plots, (c) OCVD curves and (d) electron lifetime of ZnS-Mn<sup>1.0</sup> NRs and 1.0% MnS/ZnS counterpart with simulated solar irradiation. (electrolyte: 0.1 M Na<sub>2</sub>SO<sub>4</sub> aqueous solution)
